# Supplementary material
Source: Springer Nature journal article supplement (https://www.springermedizin.de/resource/supplementary/12967_2014_1768_MOESM4_ESM.pdf/9575316)

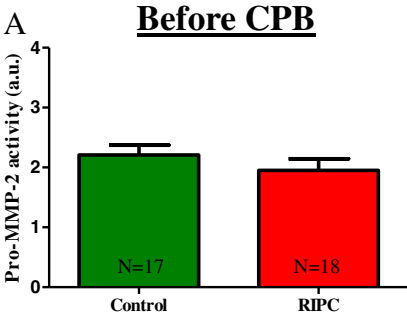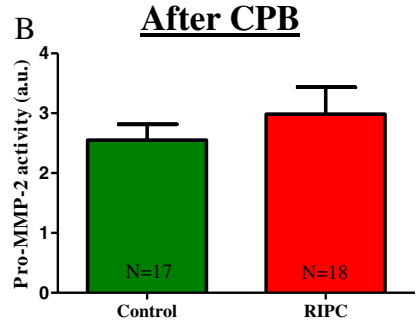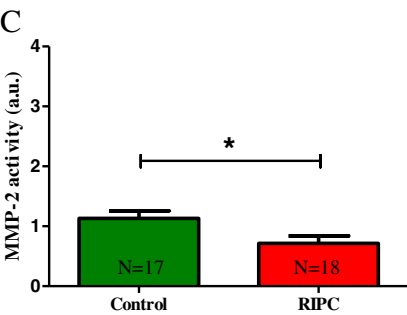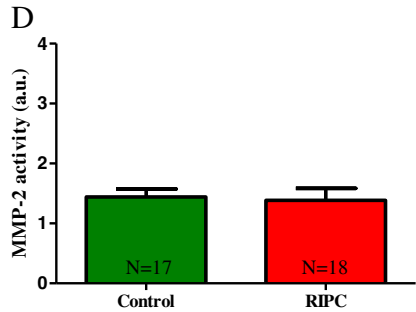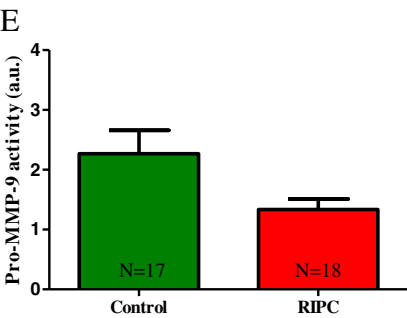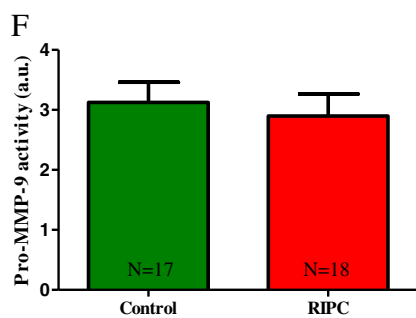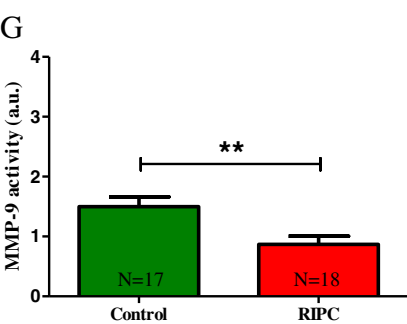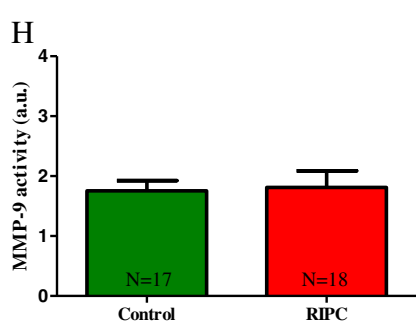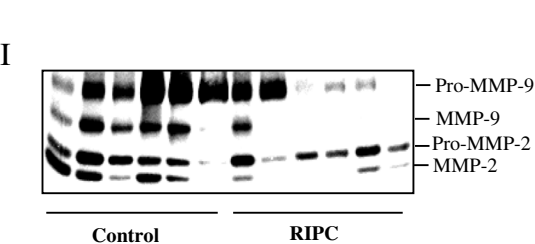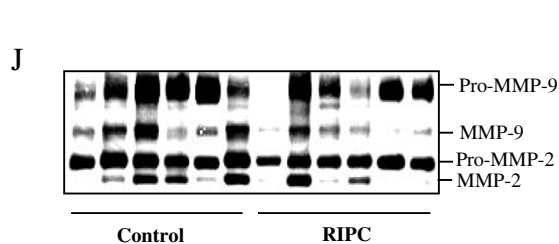

Supplement: MOESM4 [file 9575316]
